# Supplementary material
Source: Springer Nature journal article supplement (https://www.springermedizin.de/resource/supplementary/13000_2009_221_MOESM4_ESM.pdf/9624100)

Donor 1

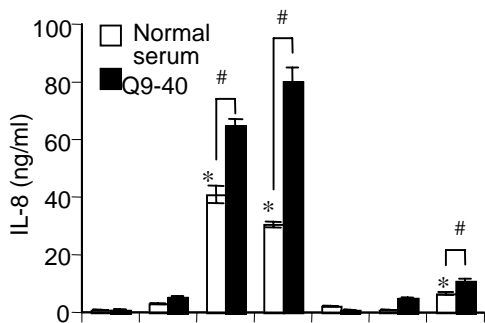

Donor 2

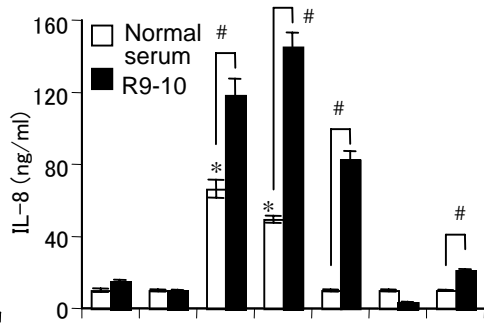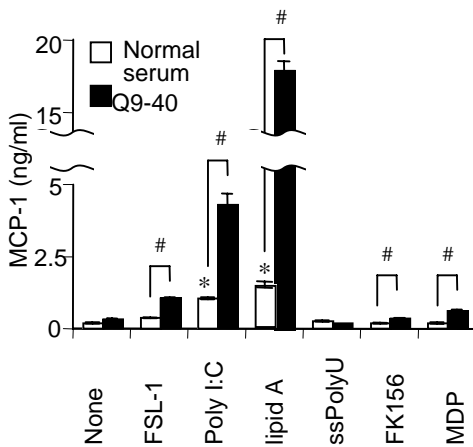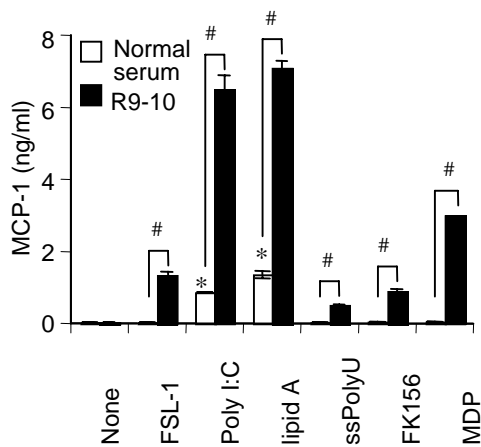

Supplement: MOESM4 [file 9624100]
